# Supplementary material for: Experimental and theoretical 2p core-level spectra of size-selected gas-phase aluminum and silicon cluster cations: chemical shifts, geometric structure, and coordination-dependent screening
Source: Royal Society of Chemistry journal article supplement (doi:10.1039/c8cp07169a), 2019-01-01
Supplement: c8cp07169a1.pdf [file c8cp07169a1.pdf]

# Experimental and Theoretical $2p$ Core-Level Spectra of Size-Selected Gas-Phase Aluminum and Silicon Cluster Cations: Chemical Shifts, Geometric Structure, and Coordination-Dependent Screening

## Supplementary Information

Michael Walter, Marlene Vogel, Vicente Zamudio-Bayer,  
Rebecka Lindblad, Thomas Reichenbach, Konstantin Hirsch,  
Andreas Langenberg, Jochen Rittmann, Alexander Kulesza,  
Roland Mitrić, Michael Moseler, Thomas Möller,  
Bernd von Issendorff, and J. Tobias Lau

January 28, 2019

### Parameters for the global optimization of silicon cluster cations

We use the nomenclature of Vilhelmsen and Hammer<sup>1</sup> in the following. A population size of 20 was employed for all cluster sizes. The cut-and-splice operator was used for pairing with a mutation probability of 0.2, where mirror and rattle mutations occurred with equal probability. In order to ensure diversity in the population an inter-atomic distance comparator was used with the comparison parameters  $\delta_{\text{rel}} = 0.015 \text{ \AA}$ ,  $\Delta E = 0.02 \text{ eV}$  and  $d_{\text{max}} = 0.7 \text{ \AA}$ .

### $2p$ binding energy and structural parameters in silicon clusters

Bulk silicon was set up in a diamond cubic crystal structure with a lattice constant of  $5.43 \text{ \AA}$ .<sup>2</sup> The corresponding coordination parameter  $c$  shows a large plateau between  $2.5$  and  $3.5 \text{ \AA}$  as shown in Fig. S1a). We choose  $R = 3 \text{ \AA}$  and  $dR = 0.2 \text{ \AA}$  for the coordination analysis presented in fig. S1b). As suggested by

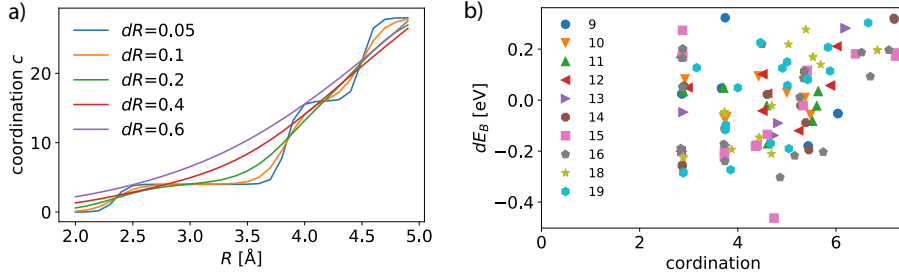

Figure S1: a) Behavior of coordination number  $c$  with  $R$  and  $dR$  for bulk silicon. b)  $2p$  binding energy difference  $dE_B$  versus  $c$  for silicon clusters. The number of silicon atoms in the cluster is given in the legend.

the analysis presented in Fig. 3 of the main text, there is no obvious correlation between coordination number and  $2p$  binding energy visible for silicon clusters.

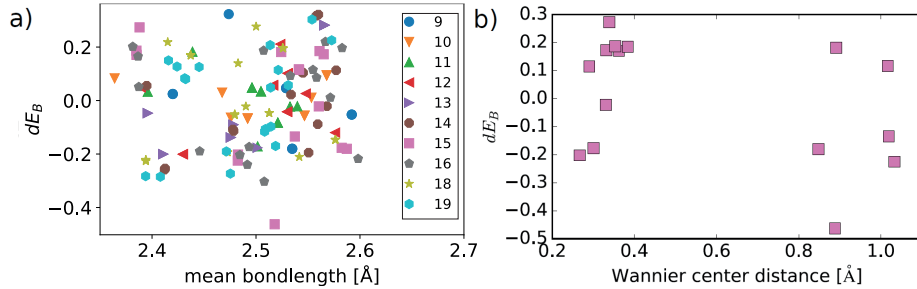

Figure S2: a)  $2p$  binding energy difference  $dE_B$  versus mean bond length for silicon clusters. The number of silicon atoms in the cluster is given in the legend. b)  $2p$  binding energy difference  $dE_B$  versus minimal distance of the center of the Wannier function to the atom that is ionized in  $\text{Si}_{15}^+$ .

Yazyev and Pasquarello<sup>3</sup> found a correlation between bond length or Wannier orbital centers<sup>4-6</sup> and Si  $2p$  core-level shifts for silicon surfaces. We therefore searched for simple correlations of these quantities to the  $2p$  binding energy difference  $dE_B$  in silicon clusters. As can be seen in Fig. S2, neither bond length nor the related distance of the Wannier orbitals' center correlate in a simple way with the  $2p$  binding energy differences in clusters.

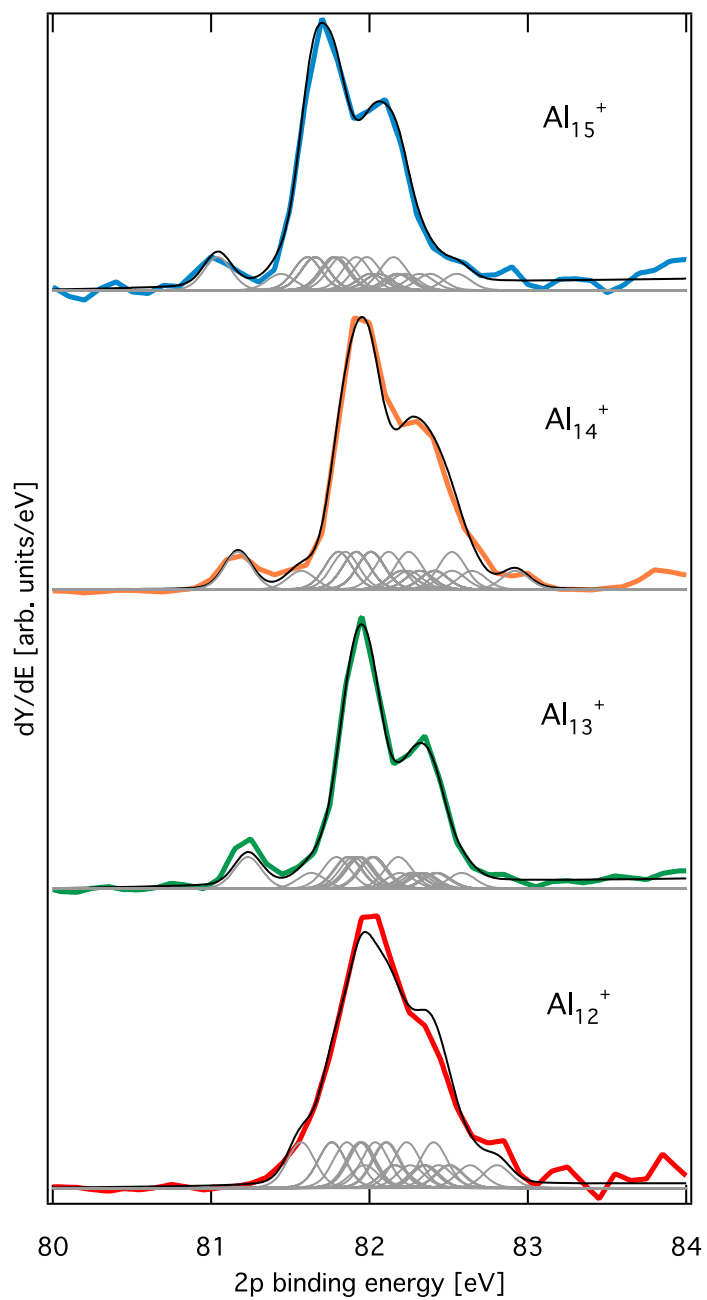

Figure S3: Fit of the experimental  $2p$  binding energy spectra for  $\text{Al}_n^+$  clusters with  $n = 12 - 15$ . Thin grey lines indicate the Voigt peaks for each atom used in the fitting of the experimental spectra and thin black line is the resulting fit.

## Surface core-level shifts of Al(111) and Al(100)

Aluminum bulk and aluminum surfaces were set up in FCC symmetry with the experimental aluminum lattice constant of  $4.05 \text{ \AA}^2$ .

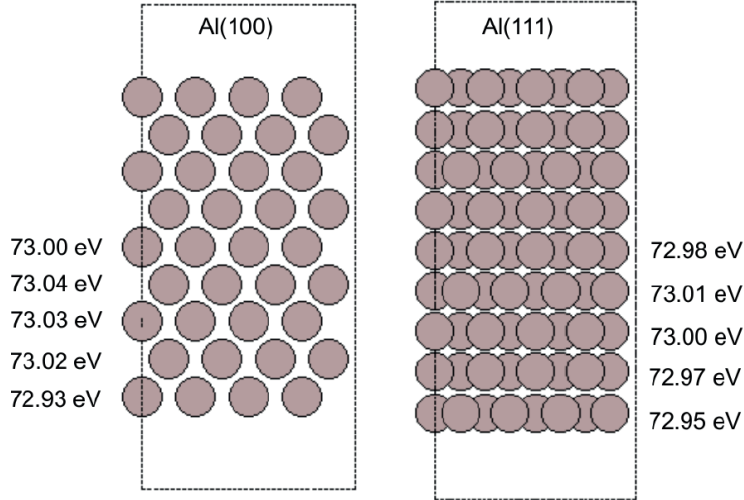

Figure S4: Unit cells and Al( $2p$ ) binding energies of our models for the 100 and 111 surfaces of aluminum. Core hole energies are given at each layer and are equal throughout the layer.

Fig. S4 shows the unit cells used for modelling the Al(100) and Al(111) surfaces of aluminum.  $5 \text{ \AA}$  vacuum were added to the unit cell in the direction of the surface normal and Dirichlet boundary conditions were applied in this direction, while periodic boundary conditions were applied otherwise. The slabs were allowed to relax to the nearest minimum without any symmetry restriction using  $3 \times 3$  k-points to sample the Brillouin zone. Periodic calculations require charge neutral unit cells. We have neutralized the system containing a core hole by an additional electron in the valence band of the system. Core hole energies were calculated with a more dense sampling of  $5 \times 5$  k-points. With this setting, the central layers of the slabs differ with less than 20 meV. While the variation of  $2p$  energies is  $\sim 100$  meV in Al(100) it is found to be only the  $\sim 50$  meV in Al(111) in agreement with literature<sup>7</sup>.

## Offset $\delta$ to calculated binding energies

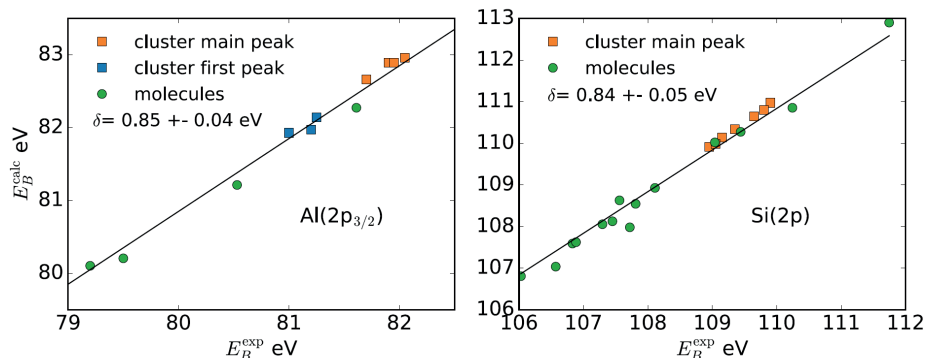

Figure S5: Calculated  $2p$  core electron binding energies pre- $\delta$  corrections versus to molecular<sup>8</sup> and cluster data. The constant offsets  $\delta$  for Al and Si corresponding to the straight line are given.

As discussed in<sup>9</sup>, the selection of molecules or complexes used in the fit required to determine  $\delta$  was rather limited in particular for Al, where only four complexes could be taken into account. We may also use, in addition to the molecular data, the experimental data of the cluster cations to improve the fit and to obtain more general values of  $\delta$ . In case of aluminum, we use the positions of two distinct peaks for this purpose, i.e. the low energy peak of  $\text{Al}_{13-15}^+$  and the main peak of  $\text{Al}_{12-15}^+$ . Both peaks can be assigned to pure Al  $2p_{3/2}$  contributions as we have checked from our calculated values. The correlation between experimental and raw calculated values of the cations aligns nicely to the neutral molecular complexes as shown in Fig. S5. Similarly, for Si  $2p$ , we also take the experimental cluster data into account in the fitting procedure. We use the main peaks of the best matching structures  $\text{Si}_{9-13}^+$  and  $\text{Si}_{15,16}^+$  for this purpose. Similarly to aluminum, these peaks can be shown to be purely  $2p_{3/2}$  contributions. The experimental peak positions are corrected for the spin-orbit splitting as we are fitting to the spin-averaged Si  $2p$  (there is most molecular data available for this value<sup>8</sup>).

## xyz coordinates of silicon cluster cations

9

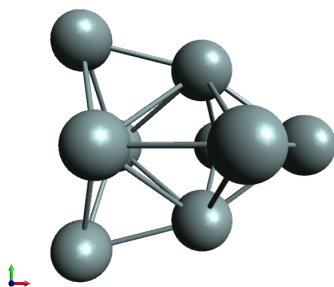

```
Si 4.73570000 6.40030000 5.13110000
Si 6.56660000 7.84230000 6.40000000
Si 4.25320000 8.42410000 6.40050000
Si 7.09980000 6.40020000 8.44840000
Si 4.73570000 6.39970000 7.66880000
Si 7.09990000 6.39960000 4.35160000
Si 4.25300000 4.37590000 6.39940000
Si 8.53940000 6.39980000 6.40000000
Si 6.56650000 4.95750000 6.39990000
```

10

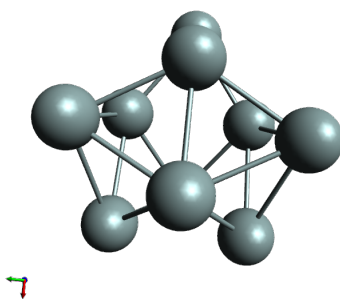

```
Si 7.49570000 6.39680000 4.15070000
Si 8.50200000 7.80000000 5.89470000
Si 8.48880000 4.97050000 5.88390000
Si 5.10490000 6.40510000 4.82600000
Si 6.19090000 7.77970000 6.90630000
Si 6.17810000 5.00450000 6.89550000
Si 6.38790000 8.55350000 4.63180000
Si 6.36790000 4.24640000 4.61500000
```

6

Si 8.02920000 6.37980000 7.84440000  
Si 4.28470000 6.40020000 7.05650000

11

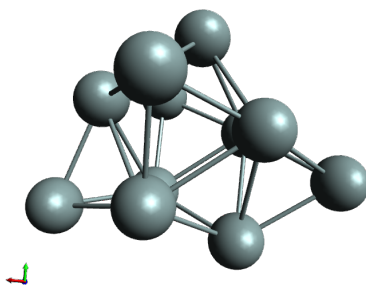

Si 10.13630000 4.73030000 6.39970000  
Si 9.35430000 7.02760000 6.40000000  
Si 8.17840000 5.05850000 7.71320000  
Si 8.18320000 7.39290000 4.20220000  
Si 6.13070000 6.62010000 7.63740000  
Si 6.30440000 4.32400000 6.39960000  
Si 6.13070000 6.62030000 5.16240000  
Si 8.18320000 7.39240000 8.59780000  
Si 7.37240000 8.46780000 6.40010000  
Si 8.17840000 5.05880000 5.08630000  
Si 4.25760000 5.71090000 6.39980000

12

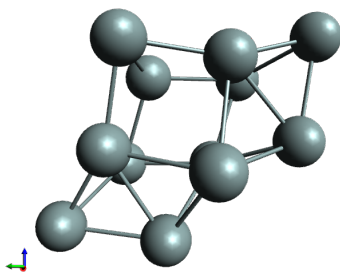

Si 6.94130000 6.46110000 5.88990000  
Si 7.75450000 8.72830000 5.93680000  
Si 5.19240000 4.27390000 8.74100000  
Si 6.46980000 10.12420000 4.36580000  
Si 4.47670000 8.79670000 8.29390000

Si 4.63700000 6.42880000 8.03580000  
Si 5.96070000 7.70340000 4.06900000  
Si 6.76430000 8.13180000 8.07280000  
Si 5.21810000 9.09220000 6.04370000  
Si 5.31150000 4.72840000 6.29330000  
Si 4.24180000 6.78040000 5.52970000  
Si 7.09900000 5.72790000 8.17930000

13

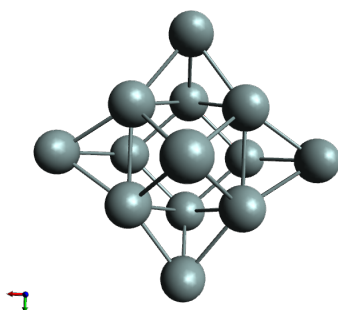

Si 7.60040000 5.56100000 4.11770000  
Si 7.60080000 4.02620000 5.87270000  
Si 9.01840000 5.94580000 6.32060000  
Si 9.32740000 7.19990000 4.04740000  
Si 9.01780000 8.45500000 6.32000000  
Si 7.59920000 10.37380000 5.87110000  
Si 6.18160000 8.45440000 6.31990000  
Si 7.60000000 7.20050000 7.95500000  
Si 6.18220000 5.94520000 6.32060000  
Si 5.87270000 7.19910000 4.04740000  
Si 7.59970000 8.83810000 4.11680000  
Si 11.00850000 7.20060000 5.74030000  
Si 4.19150000 7.19930000 5.74020000

14

Si 5.46960000 7.37560000 4.63830000  
Si 5.27690000 9.24740000 8.62370000  
Si 6.76080000 8.23020000 6.56500000  
Si 4.17500000 8.08540000 6.60540000  
Si 7.37620000 10.11940000 7.86590000  
Si 5.42750000 6.54540000 8.25800000  
Si 7.47010000 7.97800000 9.08620000  
Si 5.40020000 7.61860000 10.37640000  
Si 6.36010000 4.96600000 5.21180000  
Si 7.89870000 6.81390000 4.94450000



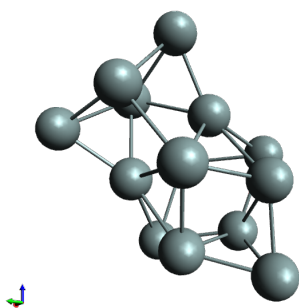

Si 5.90100000 4.28020000 7.48730000  
 Si 7.71650000 6.05580000 7.37030000  
 Si 4.10140000 5.63710000 6.38370000  
 Si 4.28900000 5.40440000 4.02390000

15-A

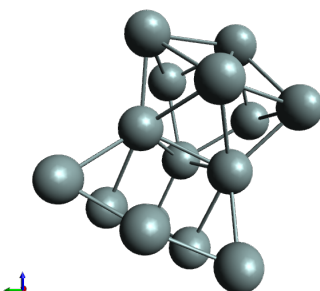

Si 8.31290000 5.42380000 7.75300000  
 Si 8.24730000 7.95700000 8.93220000  
 Si 7.94380000 7.50570000 6.55830000  
 Si 6.02400000 8.17240000 10.08910000  
 Si 7.20770000 5.93300000 9.88180000  
 Si 8.44910000 8.50590000 4.42210000  
 Si 6.51430000 7.12720000 4.31060000  
 Si 6.10890000 4.32060000 8.24410000  
 Si 4.55130000 5.83780000 4.58880000  
 Si 5.89720000 6.05480000 6.60540000  
 Si 4.35080000 7.99570000 5.51270000  
 Si 6.51610000 9.46420000 5.41080000  
 Si 5.87410000 8.35000000 7.70500000  
 Si 4.83860000 6.32920000 8.93150000  
 Si 4.56980000 10.07960000 6.60010000

15-B

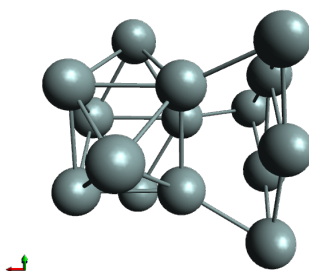

Si 4.41770000 7.26540000 5.28570000  
Si 4.58900000 9.36950000 6.33910000  
Si 4.41900000 7.60530000 7.89620000  
Si 4.59050000 5.03520000 4.53520000  
Si 4.41830000 5.17550000 6.88420000  
Si 4.59160000 5.64050000 9.19090000  
Si 6.68550000 5.78890000 5.51330000  
Si 6.68430000 8.14640000 6.49990000  
Si 7.96170000 7.63170000 4.42630000  
Si 7.95570000 8.17000000 8.64080000  
Si 9.21530000 8.17220000 6.50110000  
Si 9.21770000 5.77750000 5.49770000  
Si 9.21510000 6.10530000 8.07410000  
Si 6.68470000 6.11270000 8.04730000  
Si 7.96120000 4.25030000 6.99870000

16-A

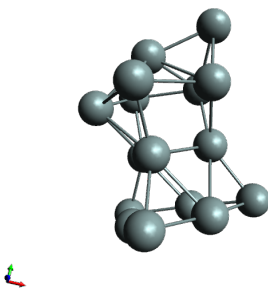

Si 6.32530000 4.25510000 6.30560000  
Si 6.51940000 6.34000000 7.96110000  
Si 6.91950000 4.00280000 8.56010000  
Si 10.11280000 6.10640000 5.83130000

Si 5.87840000 4.89060000 4.10490000  
Si 8.06550000 5.60270000 4.75140000  
Si 8.67940000 5.01400000 7.33890000  
Si 6.01040000 6.83880000 5.56580000  
Si 4.28750000 7.62830000 7.35310000  
Si 7.48900000 11.19650000 7.93200000  
Si 5.58310000 9.68480000 7.71730000  
Si 5.07250000 9.04980000 5.37490000  
Si 7.42380000 9.66410000 6.03350000  
Si 8.25410000 7.47910000 6.57010000  
Si 5.65720000 7.95910000 9.49500000  
Si 7.84450000 8.85030000 8.56060000

16-B

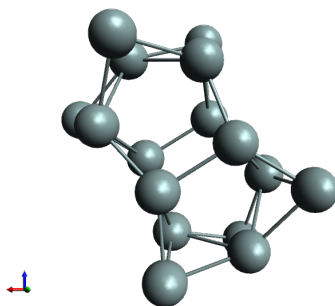

Si 6.1348300000 7.0740900000 7.7398550000  
Si 6.0622170000 4.4316650000 8.4898400000  
Si 8.0059670000 4.0005550000 7.2521160000  
Si 8.0721460000 6.6507960000 6.4975200000  
Si 4.1770110000 7.5410040000 6.5427180000  
Si 5.5447250000 6.4999990000 4.7925830000  
Si 7.9039390000 6.7247580000 4.1640670000  
Si 4.5662050000 5.2244670000 6.8005620000  
Si 4.9339500000 4.2304800000 4.6131680000  
Si 7.2898270000 4.6276430000 5.0571820000  
Si 9.5580550000 5.8696000000 8.1911480000  
Si 9.9747130000 3.5622480000 8.4497120000  
Si 6.8586660000 6.4557900000 9.9277330000  
Si 6.2361750000 4.3665910000 10.8270090000  
Si 8.5956960000 4.5851130000 10.1990640000  
Si 9.2082980000 6.8591240000 10.3795180000

18-A

Si 4.6163000000 6.4425500000 8.0331000000  
Si 5.6448000000 5.2229500000 9.8255000000

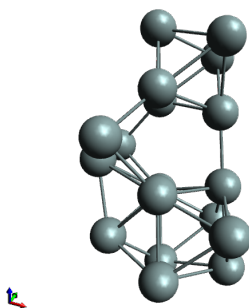

Si 4.1471000000 8.6202500000 7.1418000000  
 Si 6.3091000000 7.4356500000 10.4110000000  
 Si 7.8646000000 8.8348500000 9.2479000000  
 Si 7.8233000000 9.0019500000 11.6925000000  
 Si 5.5176000000 9.2324500000 8.9934000000  
 Si 6.9819000000 10.9211500000 10.1764000000  
 Si 5.3963000000 9.4768500000 11.4359000000  
 Si 7.7461000000 4.2788500000 5.9668000000  
 Si 9.2155000000 6.2460500000 5.2205000000  
 Si 6.8202000000 6.3770500000 4.3075000000  
 Si 9.4529000000 5.3093500000 7.5206000000  
 Si 7.1011000000 5.6448500000 7.9660000000  
 Si 5.4987000000 5.2576500000 6.0423000000  
 Si 8.5009000000 7.5881500000 7.3121000000  
 Si 6.2084000000 7.6696500000 6.3653000000  
 Si 8.0668000000 8.4520500000 5.0294000000

18-B

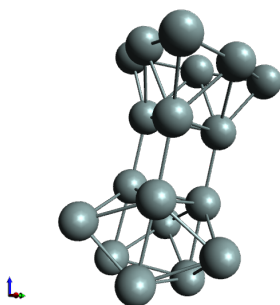

Si 8.1860000000 8.1056000000 10.9692000000  
 Si 4.1753000000 6.6376000000 11.7816000000  
 Si 6.4435000000 5.9807000000 11.5625000000  
 Si 8.7923000000 5.8329000000 11.2947000000

Si 7.092100000 10.199000000 10.772000000  
Si 5.431400000 8.579500000 11.260800000  
Si 5.096300000 6.728400000 9.560200000  
Si 7.541400000 6.321800000 9.297700000  
Si 6.624400000 8.616700000 9.021900000  
Si 4.373000000 5.805700000 4.823900000  
Si 6.968600000 5.430900000 4.519400000  
Si 8.191500000 7.494200000 5.297600000  
Si 7.267900000 5.935800000 6.950000000  
Si 5.944300000 7.834500000 4.218400000  
Si 6.297600000 8.219200000 6.673400000  
Si 5.666900000 4.201000000 6.278600000  
Si 4.007700000 8.103100000 5.795500000  
Si 4.813800000 6.290200000 7.228000000

19-A

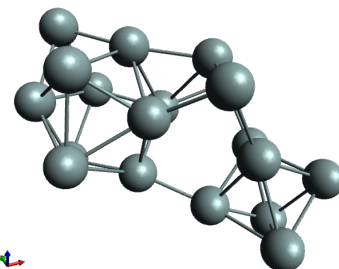

Si 6.37350000 10.90100000 7.56870000  
Si 5.50200000 11.04310000 9.86060000  
Si 7.22010000 9.40580000 9.63990000  
Si 8.17890000 9.37430000 7.31830000  
Si 9.35810000 8.24650000 9.40670000  
Si 8.66580000 5.94680000 9.86130000  
Si 10.51760000 9.49400000 7.71200000  
Si 9.51180000 5.54790000 7.65650000  
Si 10.47580000 7.40930000 6.51500000  
Si 11.66270000 5.26570000 6.49210000  
Si 5.18670000 7.90570000 10.02060000  
Si 4.68360000 7.22770000 7.58970000  
Si 7.00790000 7.13460000 8.62560000  
Si 9.65920000 4.10020000 5.59280000  
Si 5.02530000 9.43280000 6.04360000  
Si 6.80080000 7.77230000 6.24920000  
Si 4.33630000 9.55260000 8.33210000  
Si 10.66170000 6.11590000 4.36170000

Si 8.55620000 6.29450000 5.59920000

19-B

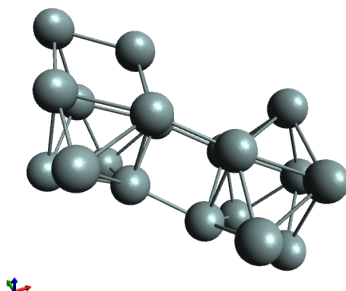

Si 5.55070000 11.19820000 10.09280000  
Si 4.28590000 8.76180000 6.92950000  
Si 5.75730000 10.71250000 7.76640000  
Si 5.01540000 8.98340000 9.39600000  
Si 6.23290000 9.86160000 5.59870000  
Si 4.90040000 6.78520000 8.50260000  
Si 7.56750000 9.85720000 9.59590000  
Si 6.41850000 7.55830000 6.63160000  
Si 7.96200000 9.36460000 7.27090000  
Si 7.18620000 7.56410000 8.96850000  
Si 10.09760000 4.60140000 5.18630000  
Si 11.71410000 6.46550000 5.92080000  
Si 10.93480000 4.66660000 7.62480000  
Si 9.81940000 6.97430000 4.30720000  
Si 8.54180000 4.00180000 7.10870000  
Si 11.23440000 7.08260000 8.32630000  
Si 8.13700000 6.05360000 5.83360000  
Si 9.71890000 7.85310000 6.57420000  
Si 8.98320000 6.14390000 8.19030000

19-C

Si 10.32330000 6.09130000 4.64690000  
Si 9.63500000 4.34300000 6.56580000  
Si 11.76550000 7.85160000 5.33760000  
Si 10.55630000 4.76830000 8.71470000  
Si 8.78890000 4.31610000 4.36710000  
Si 11.31900000 6.45460000 7.21490000  
Si 9.53230000 7.93350000 6.19190000  
Si 8.91460000 6.34240000 7.96660000  
Si 7.92150000 6.13710000 5.72390000  
Si 6.39040000 11.68390000 10.03290000

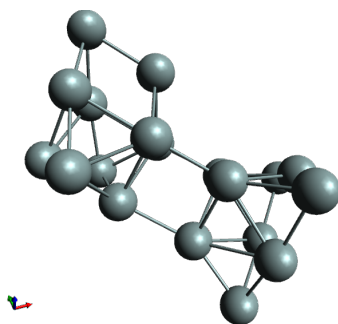

Si 5.44180000 9.52140000 9.59820000  
 Si 6.01430000 11.05910000 7.74500000  
 Si 4.23450000 9.29950000 7.39560000  
 Si 8.04820000 10.05950000 9.18110000  
 Si 4.87110000 7.28250000 8.81320000  
 Si 7.23200000 7.82470000 8.76580000  
 Si 5.84960000 9.99850000 5.55730000  
 Si 7.80290000 9.40790000 6.87700000  
 Si 6.03140000 7.67390000 6.57760000

19-D

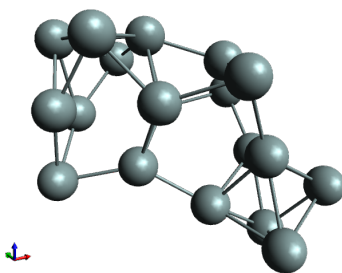

Si 9.12940000 7.61490000 9.65700000  
 Si 8.30330000 5.36030000 9.91230000  
 Si 10.29350000 9.04450000 8.09270000  
 Si 8.97980000 5.21760000 7.62280000  
 Si 10.04200000 7.13430000 6.66820000  
 Si 9.99190000 6.12420000 4.35760000  
 Si 11.01360000 4.91280000 6.28380000  
 Si 8.85050000 4.05870000 5.39000000  
 Si 7.98890000 6.32640000 5.75680000  
 Si 7.24100000 8.96730000 10.31650000  
 Si 5.37610000 10.27160000 7.75480000

Si 4.2400000 8.3304000 8.7595000  
Si 7.1442000 11.1411000 9.1209000  
Si 5.2152000 7.6397000 10.8431000  
Si 4.9144000 10.2166000 10.2221000  
Si 7.9092000 9.1892000 7.8584000  
Si 6.6321000 6.8437000 9.0276000  
Si 4.1878000 8.7078000 6.4055000  
Si 6.3289000 7.7114000 6.8102000

### xyz coordinates of aluminum cluster cations

12-A

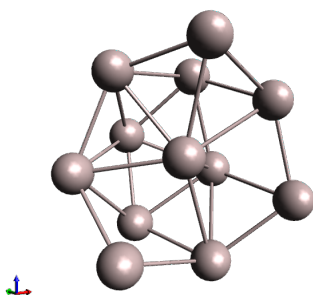

Al 6.12483 5.36710 6.73275  
Al 8.20948 6.87295 5.95633  
Al 5.13613 6.96380 8.73438  
Al 4.08805 7.15557 6.28438  
Al 6.34063 8.55044 6.88841  
Al 4.31610 5.21908 4.56129  
Al 8.56374 4.92652 8.01416  
Al 8.68794 4.22892 5.54620  
Al 6.42834 4.83677 9.49505  
Al 7.82870 7.36332 8.59171  
Al 6.07484 7.68208 4.49938  
Al 6.86642 5.24116 4.04478

12-B

Al -0.0617335 -0.7929182 -0.4629581  
Al -2.3522906 -1.8739716 0.4888191  
Al -1.3945083 0.5147432 1.7249816  
Al -2.5127140 0.6718646 -0.8000845  
Al 0.0260897 1.9080021 -0.3241330  
Al -2.3226336 -1.6541278 -2.0912367  
Al 1.9430750 -1.7027316 1.1460657



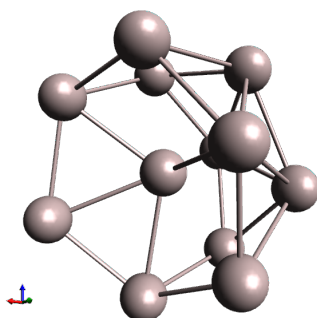

Al 1.9625982 -2.2697482 -1.4603195  
 Al -0.4124814 -1.9174469 2.2045338  
 Al 1.2597123 0.7486901 1.6343311  
 Al -0.6438633 1.0304812 -2.6654489  
 Al 0.0466246 -1.4257028 -3.1132865

13

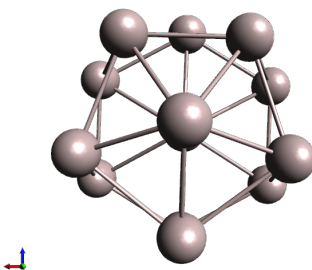

Al 6.41301036 5.07773508 6.83359116  
 Al 4.08088351 4.21650757 8.01844691  
 Al 8.67725591 6.74486814 6.38338384  
 Al 5.02202419 6.58399799 8.84475186  
 Al 4.20180863 6.77663394 6.26342011  
 Al 6.43010348 7.88648660 7.05075466  
 Al 4.19247176 4.29671807 5.40532880  
 Al 8.63297724 4.16550240 8.18434736  
 Al 8.71426540 4.25234736 5.57000339  
 Al 6.30902360 4.15001422 9.41499242  
 Al 7.70792833 6.55824128 8.92302003  
 Al 6.48168264 6.92802783 4.64953923  
 Al 6.50198738 4.36226859 4.18308494

14

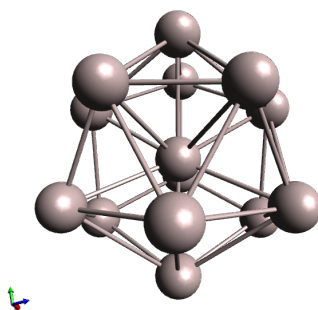

Al 6.82047000 6.59684000 6.98758000  
 Al 4.74188000 4.77016600 7.53891400  
 Al 9.31664100 7.04137200 6.08002000  
 Al 5.23255100 7.11562500 9.13150500  
 Al 4.26926400 7.46585100 6.63870400  
 Al 6.06299100 9.17523800 7.64173000  
 Al 5.19822000 5.62680100 4.98517800  
 Al 9.15184000 5.37614700 8.11180100  
 Al 7.37221200 4.13095000 6.42445100  
 Al 6.85395900 5.03066600 9.25212500  
 Al 8.02908700 7.73164200 8.98930700  
 Al 6.51052300 8.29289500 5.04061700  
 Al 7.68983200 5.90930300 4.34957700  
 Al 8.51064200 9.45219300 6.74806300

15

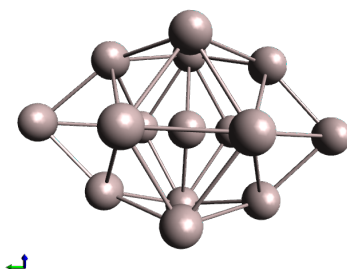

Al 8.00524500 5.79420900 8.02465200  
 Al 8.05430800 9.98905800 8.12911400  
 Al 4.12237400 8.03601500 6.25465800  
 Al 8.45632700 9.38057900 5.28643900  
 Al 5.15312300 6.50235800 8.30824100  
 Al 8.38974000 6.54160400 5.19580600

18

Al 5.20400900 9.34131100 8.41208900  
Al 5.50894400 5.93843800 5.42857700  
Al 6.80025200 7.93382200 6.79916000  
Al 6.36073600 8.06472500 4.10467700  
Al 5.63344000 10.12505500 5.61655300  
Al 6.89100700 11.92222200 6.92968600  
Al 6.72411000 4.07611500 6.65993200  
Al 7.24263900 7.85905100 9.49536400  
Al 9.47622900 7.88649900 7.34925900

## References

- [1] L. B. Vilhelmsen and B. Hammer, *The Journal of Chemical Physics*, 2014, **141**, 044711.
- [2] *CRC Handbook of Chemistry and Physics*, ed. D. R. Lide, CRC Press, Boca Raton, 85th edn., 2004.
- [3] O. V. Yazyev and A. Pasquarello, *Physical Review Letters*, 2006, **96**, 157601.
- [4] K. S. Thygesen, L. B. Hansen and K. W. Jacobsen, *Physical Review B*, 2005, **72**, 125119.
- [5] J. Enkovaara, C. Rostgaard, J. J. Mortensen, J. Chen, M. Dułak, L. Ferrighi, J. Gavnholt, C. Glinsvad, V. Haikola, H. A. Hansen, H. H. Kristoffersen, M. Kuisma, A. H. Larsen, L. Lehtovaara, M. Ljungberg, O. Lopez-Acevedo, P. G. Moses, J. Ojanen, T. Olsen, V. Petzold, N. A. Romero, J. Stausholm-Møller, M. Strange, G. A. Tritsarlis, M. Vanin, M. Walter, B. Hammer, H. Häkkinen, G. K. H. Madsen, R. M. Nieminen, J. K. Nørskov, M. Puska, T. T. Rantala, J. Schiøtz, K. S. Thygesen and K. W. Jacobsen, *Journal of Physics: Condensed Matter*, 2010, **22**, 253202.
- [6] N. Marzari, A. A. Mostofi, J. R. Yates, I. Souza and D. Vanderbilt, *Reviews of Modern Physics*, 2012, **84**, 1419.
- [7] M. Borg, M. Birgersson, M. Smedh, A. Mikkelsen, D. L. Adams, R. Nyholm, C.-O. Almbladh and J. N. Andersen, *Physical Review B*, 2004, **69**, 235418.
- [8] W. L. Jolly, K. D. Bomben and C. J. Eyermann, *Atomic Data and Nuclear Data Tables*, 1984, **31**, 433.
- [9] M. Walter, M. Moseler and L. Pastewka, *Phys. Rev. B*, 2016, **94**, 041112(R).
